# Supplementary material for: The temporal foliar transcriptome of the perennial C3 desert plant Rhazya stricta in its natural environment
Source: PubMed Central journal article supplement (PMC3906910; doi:10.1186/1471-2229-14-2), 2014-01-04

Supplemental Figure 1. *Rhazya stricta* plants at sampling location.

a) shows plants at the Barah site

b) shows sampling for apical leaves

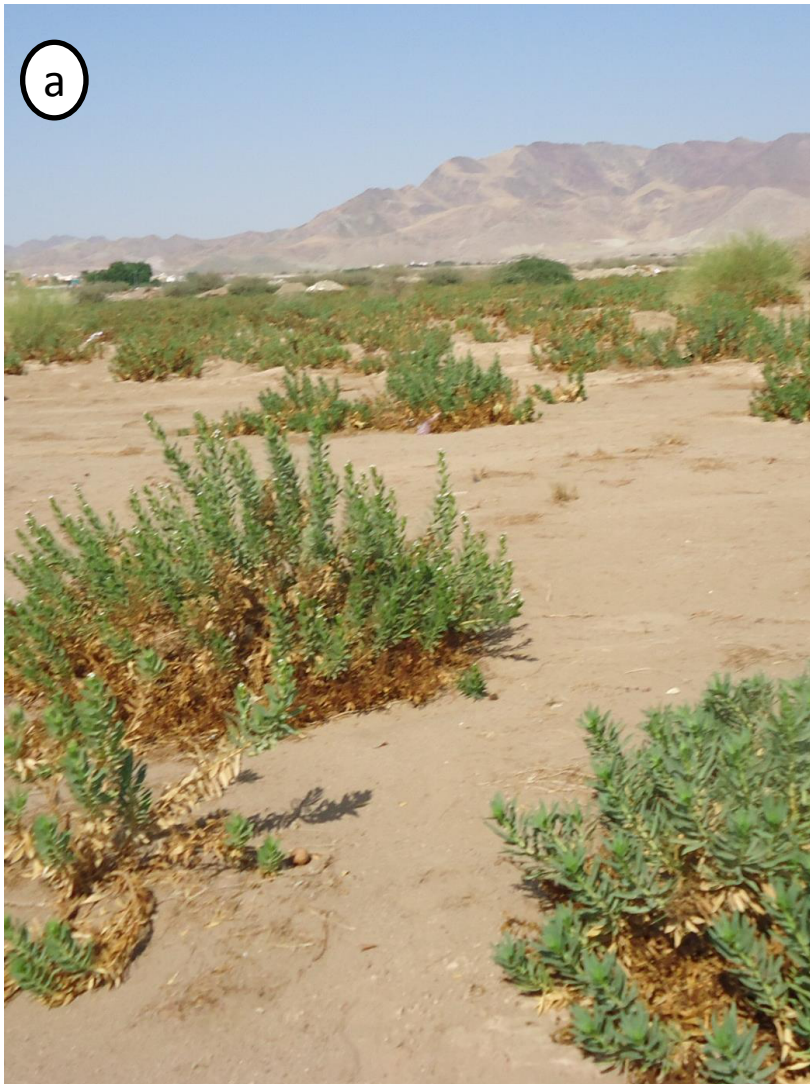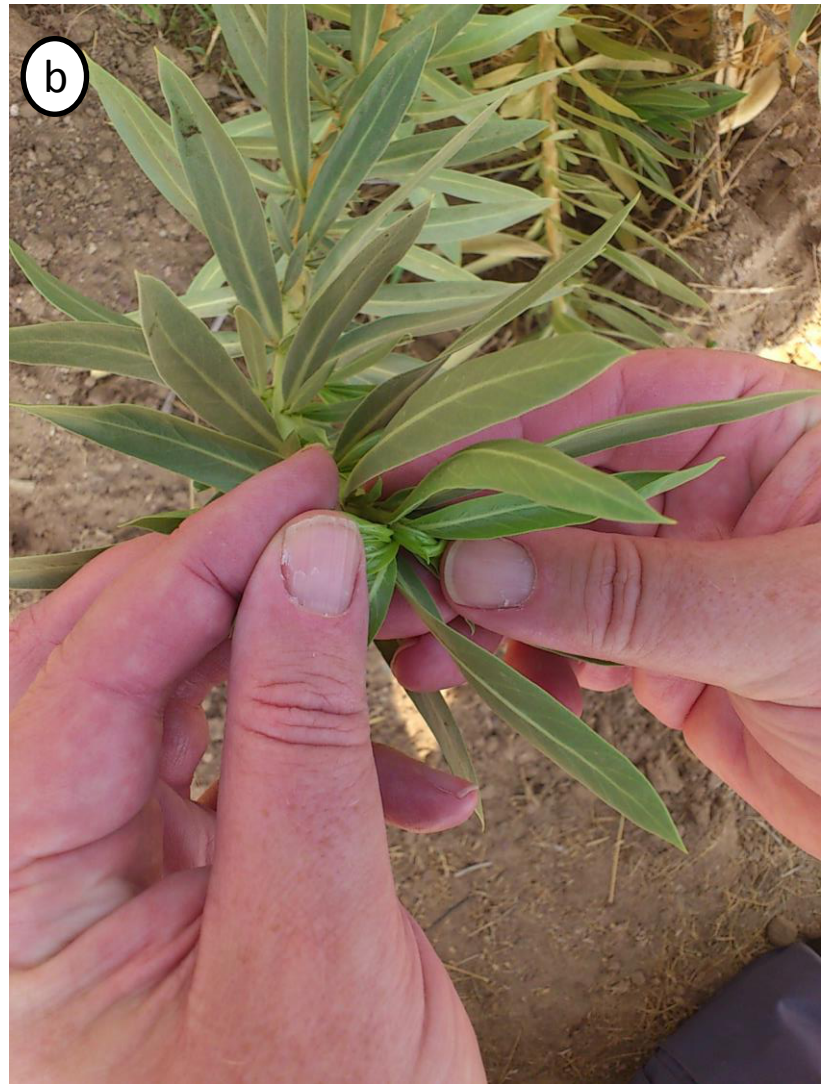

Supplement: 1471-2229-14-2-S1.pdf [file 1471-2229-14-2-S1.pdf]
