# Supplementary material for: The temporal foliar transcriptome of the perennial C3 desert plant Rhazya stricta in its natural environment
Source: PubMed Central journal article supplement (PMC3906910; doi:10.1186/1471-2229-14-2), 2014-01-04
Supplement: 1471-2229-14-2-S5.pdf [file 1471-2229-14-2-S5.pdf]

Supplemental Table 5. Protective enzymes

| <b>ID</b>       | <b>Process</b>    |
|-----------------|-------------------|
| R.stricta.18151 | Photorespiration  |
| R.stricta.21224 | Photorespiration  |
| R.stricta.25724 | Photorespiration  |
| R.stricta.4377  | Photorespiration  |
| R.stricta.5586  | Photorespiration  |
| R.stricta.7227  | Photorespiration  |
| R.stricta.6844  | Photorespiration  |
| R.stricta.9898  | Photorespiration  |
| R.stricta.17161 | Photorespiration  |
| R.stricta.4463  | Photorespiration  |
| R.stricta.4478  | Photorespiration  |
| R.stricta.12582 | Photorespiration  |
| R.stricta.21246 | Photorespiration  |
| R.stricta.20361 | Photorespiration  |
| R.stricta.21161 | Photorespiration  |
| R.stricta.23984 | Photorespiration  |
| R.stricta.14031 | Photorespiration  |
| R.stricta.6885  | Photorespiration  |
| R.stricta.19996 | Photorespiration  |
| R.stricta.23421 | Photorespiration  |
| R.stricta.24773 | Photorespiration  |
| R.stricta.1433  | Photorespiration  |
| R.stricta.2365  | Photorespiration  |
| R.stricta.10633 | Xanthophyll cycle |
| R.stricta.12393 | Xanthophyll cycle |
| R.stricta.13114 | Xanthophyll cycle |
| R.stricta.15435 | NPQ4              |
| R.stricta.17543 | PTOX              |
| R.stricta.18857 | PTOX              |
